# Supplementary material for: Distinct Emotional and Cardiac Responses to Audio Erotica between Genders
Source: MDPI journal article supplement (doi:10.3390/bs13030273), 2023-03-20
Supplement: s1 [file s1]

Table S1: Stimuli (bold) used in this study.

| ID        | Type | Chi-square |         | P-value     |         |
|-----------|------|------------|---------|-------------|---------|
|           |      | Arousal    | Valence | Arousal     | Valence |
| <b>1</b>  | E    | 4.29       | 7.64    | <b>0.75</b> | 0.37    |
| <b>4</b>  | E    | 6.16       | 4.7     | <b>0.63</b> | 0.58    |
| <b>5</b>  | E    | 6.63       | 6.7     | <b>0.47</b> | 0.46    |
| <b>6</b>  | E    | 7.97       | 4.03    | <b>0.44</b> | 0.67    |
| <b>8</b>  | E    | 8.17       | 2.96    | <b>0.41</b> | 0.81    |
| <b>10</b> | E    | 6.13       | 7.11    | <b>0.41</b> | 0.21    |
| 2         | E    | 10.11      | 4.96    | 0.26        | 0.67    |
| 3         | E    | 10.31      | 5.96    | 0.17        | 0.54    |
| 7         | E    | 10.64      | 5.31    | 0.16        | 0.62    |
| 9         | E    | 13.99      | 1.62    | 0.05        | 0.95    |
| <b>12</b> | N    | 1.49       | 3.96    | <b>0.96</b> | 0.41    |
| <b>13</b> | N    | 2.82       | 1.23    | <b>0.83</b> | 0.54    |
| <b>15</b> | N    | 5.63       | 5.25    | <b>0.78</b> | 0.16    |
| <b>17</b> | N    | 3.43       | 6.06    | <b>0.75</b> | 0.42    |
| <b>18</b> | N    | 3.1        | 4.03    | <b>0.69</b> | 0.13    |
| <b>19</b> | N    | 4.96       | 6.06    | <b>0.67</b> | 0.2     |
| 11        | N    | 6.3        | 0.01    | 0.51        | 0.99    |
| 14        | N    | 3.43       | 2.96    | 0.49        | 0.57    |
| 16        | N    | 6.83       | 2.96    | 0.45        | 0.4     |
| 20        | N    | 5.92       | 3.37    | 0.31        | 0.5     |
| <b>22</b> | H    | 4.96       | 4.96    | <b>0.67</b> | 0.67    |
| <b>23</b> | H    | 5.16       | 8.97    | <b>0.64</b> | 0.26    |
| <b>26</b> | H    | 6.3        | 5.3     | <b>0.61</b> | 0.51    |
| <b>27</b> | H    | 6.5        | 4.96    | <b>0.48</b> | 0.55    |
| <b>29</b> | H    | 6.63       | 8.97    | <b>0.47</b> | 0.35    |
| <b>30</b> | H    | 8.3        | 6.16    | <b>0.4</b>  | 0.41    |
| 21        | H    | 7.44       | 6.83    | 0.28        | 0.45    |
| 24        | H    | 9.98       | 3.62    | 0.27        | 0.61    |
| 25        | H    | 9.31       | 6.16    | 0.23        | 0.41    |
| 28        | H    | 7.11       | 9.17    | 0.21        | 0.33    |

Note: E = erotic, N = neutral, H = happy.
